# Supplementary material
Source: PubMed Central journal article supplement (PMC10099181)
Supplement: mmc1.pdf [file mmc1.pdf]

**Supplemental information**

**The T-cell-directed vaccine BNT162b4 encoding  
conserved non-spike antigens protects animals  
from severe SARS-CoV-2 infection**

**Christina M. Arieta, Yushu Joy Xie, Daniel A. Rothenberg, Huitian Diao, Dewi Harjanto, Shirisha Meda, Krisann Marquart, Byron Koenitzer, Tracey E. Sciuto, Alexander Lobo, Adam Zuiani, Stefanie A. Krumm, Carla Iris Cadima Couto, Stephanie Hein, André P. Heinen, Thomas Ziegenhals, Yunpeng Liu-Lupo, Annette B. Vogel, John R. Srouji, Stephanie Fesser, Kaushik Thanki, Kerstin Walzer, Theresa A. Addona, Özlem Türeci, Uğur Şahin, Richard B. Gaynor, and Asaf Poran**

## Supplementary Information

### Supplemental Tables

**Table S1** - Summary of SARS-CoV-2 antigenic segments selected for inclusion in BNT162b4. SARS-CoV-2 amino acid coordinates are based on the NCBI Reference Sequence NC\_045512 (Related to Figure 1).

| Segment | Antigen      | SARS-CoV-2 Start | SARS-CoV-2 End | BNT162b4 Start | BNT162b4 End |
|---------|--------------|------------------|----------------|----------------|--------------|
| 1       | Nucleocapsid | 206              | 372            | 30             | 196          |
| 2       | ORF1ab NSP2  | 807              | 816            | 201            | 210          |
| 3       | ORF1ab NSP1  | 108              | 123            | 211            | 226          |
| 4       | ORF1ab NSP2  | 282              | 290            | 227            | 235          |
| 5       | ORF1ab NSP3  | 906              | 916            | 236            | 246          |
| 6       | ORF1ab NSP2  | 376              | 387            | 247            | 258          |
| 7       | ORF1ab NSP3  | 2384             | 2392           | 259            | 267          |
| 8       | Membrane     | 37               | 103            | 272            | 338          |
| 9       | ORF1ab NSP3  | 1636             | 1650           | 343            | 357          |
| 10      | ORF1ab NSP3  | 1937             | 1947           | 358            | 368          |
| 11      | ORF1ab NSP4  | 2799             | 2809           | 369            | 379          |
| 12      | ORF1ab NSP3  | 2563             | 2571           | 380            | 388          |
| 13      | ORF1ab NSP3  | 2616             | 2626           | 389            | 399          |
| 14      | ORF1ab NSP3  | 1367             | 1375           | 400            | 408          |
| 15      | Membrane     | 156              | 188            | 413            | 445          |
| 16      | ORF1ab NSP3  | 1148             | 1156           | 450            | 458          |
| 17      | ORF1ab NSP3  | 1863             | 1873           | 459            | 469          |
| 18      | ORF1ab NSP3  | 1319             | 1329           | 470            | 480          |
| 19      | ORF1ab NSP2  | 735              | 747            | 485            | 497          |
| 20      | ORF1ab NSP3  | 825              | 833            | 498            | 506          |
| 21      | ORF1ab NSP2  | 474              | 484            | 507            | 517          |

**Table S2** - Summary of number of unique peptide-HLA-I pairs, epitopes, and alleles contained within each segment of BNT162b4 (Related to Figure 1 and Figure S1).

| Segment Number            | Antigen      | Length (Amino Acids) | Unique Peptide-HLA-I Pairs | Unique Epitopes | Unique HLA-I Alleles |
|---------------------------|--------------|----------------------|----------------------------|-----------------|----------------------|
| 1                         | Nucleocapsid | 167                  | 732                        | 200             | 105                  |
| 2                         | ORF1ab NSP2  | 10                   | 40                         | 4               | 34                   |
| 3                         | ORF1ab NSP1  | 16                   | 195                        | 27              | 77                   |
| 4                         | ORF1ab NSP2  | 9                    | 12                         | 3               | 11                   |
| 5                         | ORF1ab NSP3  | 11                   | 112                        | 9               | 63                   |
| 6                         | ORF1ab NSP2  | 12                   | 59                         | 12              | 38                   |
| 7                         | ORF1ab NSP3  | 9                    | 25                         | 3               | 16                   |
| 8                         | Membrane     | 67                   | 544                        | 124             | 87                   |
| 9                         | ORF1ab NSP3  | 15                   | 78                         | 18              | 40                   |
| 10                        | ORF1ab NSP3  | 11                   | 41                         | 7               | 29                   |
| 11                        | ORF1ab NSP4  | 11                   | 26                         | 6               | 19                   |
| 12                        | ORF1ab NSP3  | 9                    | 5                          | 3               | 5                    |
| 13                        | ORF1ab NSP3  | 11                   | 47                         | 6               | 22                   |
| 14                        | ORF1ab NSP3  | 9                    | 6                          | 1               | 6                    |
| 15                        | Membrane     | 33                   | 197                        | 48              | 79                   |
| 16                        | ORF1ab NSP3  | 9                    | 8                          | 1               | 8                    |
| 17                        | ORF1ab NSP3  | 11                   | 15                         | 6               | 11                   |
| 18                        | ORF1ab NSP3  | 11                   | 27                         | 7               | 24                   |
| 19                        | ORF1ab NSP2  | 13                   | 52                         | 10              | 42                   |
| 20                        | ORF1ab NSP3  | 9                    | 29                         | 2               | 28                   |
| 21                        | ORF1ab NSP2  | 11                   | 7                          | 3               | 7                    |
| <b>Total for BNT162b4</b> |              | <b>598</b>           | <b>2257</b>                | <b>500</b>      | <b>105</b>           |

**Table S3** - Summary of number of unique peptide-HLA-II pairs, epitopes, and alleles contained within N and M segments of BNT162b4 (Related to Figure 1).

| Segment Number            | Antigen      | Length (Amino Acids) | Unique Peptide-HLA-II Pairs | Unique HLA-II Epitopes | Unique HLA-II Alleles |
|---------------------------|--------------|----------------------|-----------------------------|------------------------|-----------------------|
| 1                         | Nucleocapsid | 167                  | 1396                        | 605                    | 58                    |
| 8                         | Membrane     | 67                   | 265                         | 187                    | 22                    |
| 15                        | Membrane     | 33                   | 331                         | 94                     | 35                    |
| <b>Total for BNT162b4</b> |              | <b>598</b>           | <b>1992</b>                 | <b>886</b>             | <b>70</b>             |
